# Supplementary material for: Cadmium oxide nanoparticles/graphene composite: synthesis, theoretical insights into reactivity and adsorption study
Source: Royal Society of Chemistry journal article supplement (doi:10.1039/d1ra04754j), 2021-01-01
Supplement: d1ra04754j1.pdf [file d1ra04754j1.pdf]

## Supporting Information

### Cadmium oxide nanoparticles/graphene composite: Synthesis, theoretical insights into reactivity and adsorption study

*Dalal Z. Husein<sup>(1),\*</sup>, Reda Hassanien<sup>(1)</sup>, Mona Khamis<sup>(1)</sup>*

<sup>(1)</sup>Chemistry Department, Faculty of Science, New Valley University, El-Kharja72511, Egypt

\*E-mail: [dalal\\_husein@yahoo.com](mailto:dalal_husein@yahoo.com), [dalal\\_husein@scinv.au.edu.eg](mailto:dalal_husein@scinv.au.edu.eg)

#### Contents

- The calculated values of stabilization energies,  $E^2$ , and its related interactions of Lewis and non-Lewis orbitals.

Table S1 The calculated values of stabilization energies,  $E^2$ , and its related interactions of Lewis and non-Lewis orbitals.

| Donor NBO (i)     | Acceptor NBO (j)    | $E^2$<br>kcal/mol | a.u.  | a.u.  |
|-------------------|---------------------|-------------------|-------|-------|
| BD ( 2) C 2 - C 3 | LP ( 1) C 1         | 62.47             | 0.1   | 0.086 |
|                   | LP*( 1) C 4         | 51.15             | 0.14  | 0.089 |
|                   | BD*( 2) C 7 - C 25  | 19.27             | 0.29  | 0.067 |
|                   | BD*( 2) C 23 - C 24 | 15.95             | 0.29  | 0.065 |
| BD ( 2) C 5 - C 6 | LP ( 1) C 1         | 71.95             | 0.11  | 0.094 |
|                   | LP*( 1) C 4         | 53.61             | 0.15  | 0.092 |
|                   | BD*( 2) C 15 - C 16 | 18.54             | 0.29  | 0.069 |
|                   | BD ( 2) C 7 - C 25  | BD*( 2) C 2 - C 3 | 21.88 | 0.27  |
|                   | BD*( 2) C 9 - C 10  | 22.23             | 0.28  | 0.071 |
|                   | BD*( 2) C 23 - C 24 | 15.75             | 0.28  | 0.063 |
|                   | BD*( 2) C 28 - C 29 | 16.39             | 0.28  | 0.064 |
|                   | BD ( 2) C 8 - C 14  | LP*( 1) C 4       | 55.44 | 0.14  |
|                   | LP ( 1) C 13        | 51.89             | 0.13  | 0.086 |
|                   | BD*( 2) C 9 - C 10  | 21.81             | 0.28  | 0.071 |

|                     |                     |        |      |       |
|---------------------|---------------------|--------|------|-------|
|                     | BD*( 2) C 15 - C 16 | 16.74  | 0.28 | 0.064 |
| BD ( 2) C 9 - C 10  | BD*( 2) C 7 - C 25  | 22.18  | 0.28 | 0.071 |
|                     | BD*( 2) C 8 - C 14  | 22.48  | 0.27 | 0.071 |
|                     | BD*( 2) C 11 - C 12 | 23.37  | 0.26 | 0.071 |
|                     | BD*( 2) C 30 - C 35 | 22.05  | 0.27 | 0.069 |
| BD ( 2) C 11 - C 12 | LP ( 1) C 13        | 69.44  | 0.13 | 0.097 |
|                     | LP*( 1) C 33        | 56.94  | 0.13 | 0.089 |
|                     | BD*( 2) C 9 - C 10  | 22.7   | 0.28 | 0.071 |
| BD ( 2) C 15 - C 16 | BD*( 2) C 5 - C 6   | 18.58  | 0.27 | 0.068 |
|                     | BD*( 2) C 8 - C 14  | 16.37  | 0.3  | 0.066 |
| BD ( 2) C 23 - C 24 | BD*( 2) C 2 - C 3   | 17.2   | 0.28 | 0.065 |
|                     | BD*( 2) C 7 - C 25  | 17.61  | 0.29 | 0.067 |
| BD ( 2) C 28 - C 29 | BD*( 2) C 7 - C 25  | 16.6   | 0.3  | 0.066 |
|                     | BD*( 2) C 30 - C 35 | 18.01  | 0.29 | 0.068 |
| BD ( 2) C 30 - C 35 | LP*( 1) C 33        | 69.49  | 0.13 | 0.097 |
|                     | BD*( 2) C 9 - C 10  | 21.32  | 0.28 | 0.069 |
|                     | BD*( 2) C 28 - C 29 | 19.04  | 0.28 | 0.069 |
| LP ( 1) C 1         | BD*( 2) C 2 - C 3   | 51.43  | 0.18 | 0.098 |
|                     | BD*( 2) C 5 - C 6   | 73.15  | 0.16 | 0.11  |
| LP*( 1) C 4         | BD*( 2) C 2 - C 3   | 72.96  | 0.14 | 0.106 |
|                     | BD*( 2) C 5 - C 6   | 84.64  | 0.12 | 0.105 |
|                     | BD*( 2) C 8 - C 14  | 69.2   | 0.14 | 0.105 |
| LP ( 1) C 13        | BD*( 2) C 8 - C 14  | 62.22  | 0.15 | 0.102 |
|                     | BD*( 2) C 11 - C 12 | 82.26  | 0.14 | 0.112 |
| LP*( 1) C 33        | BD*( 2) C 11 - C 12 | 65.27  | 0.14 | 0.099 |
|                     | BD*( 2) C 30 - C 35 | 82.16  | 0.14 | 0.112 |
| BD*( 2) C 2 - C 3   | BD*( 2) C 23 - C 24 | 201.38 | 0.01 | 0.077 |
| BD*( 2) C 5 - C 6   | BD*( 2) C 15 - C 16 | 112.89 | 0.02 | 0.072 |
| BD*( 2) C 11 - C 12 | BD*( 2) C 9 - C 10  | 262.6  | 0.01 | 0.079 |
| BD*( 2) C 30 - C 35 | BD*( 2) C 9 - C 10  | 309.27 | 0.01 | 0.082 |
| LP*( 6)Cd 37        | LP*( 8)Cd 37        | 48.58  | 0.32 | 0.207 |
|                     | LP*( 9)Cd 37        | 9.97   | 0.21 | 0.078 |
|                     | RY*( 6)Cd 37        | 19.77  | 3.4  | 0.473 |
|                     | RY*( 9)Cd 37        | 13.59  | 1.2  | 0.233 |
|                     | LP*( 9)Cd 38        | 35.63  | 0.64 | 0.261 |
| LP*( 7)Cd 37        | LP*( 7)Cd 38        | 9.46   | 0.01 | 0.028 |
| LP*( 6)Cd 38        | LP*( 8)Cd 37        | 87.7   | 0.31 | 0.251 |
|                     | LP*( 9)Cd 37        | 42.86  | 0.2  | 0.145 |
|                     | LP*( 8)Cd 38        | 10.49  | 0.1  | 0.05  |
|                     | LP*( 9)Cd 38        | 76.86  | 0.63 | 0.346 |
|                     | RY*( 4)Cd 38        | 31.74  | 2.59 | 0.472 |
|                     | RY*( 6)Cd 38        | 25.47  | 1.53 | 0.325 |

|  |              |              |       |      |       |
|--|--------------|--------------|-------|------|-------|
|  |              | RY*( 7)Cd 38 | 27.3  | 0.58 | 0.208 |
|  |              | RY*( 9)Cd 38 | 22.5  | 0.39 | 0.154 |
|  |              | RY*( 3) O 39 | 9.99  | 1.17 | 0.178 |
|  | LP ( 1) O 39 | LP*( 9)Cd 37 | 15.18 | 1.01 | 0.112 |
|  | LP ( 2) O 39 | LP*( 7)Cd 37 | 9.33  | 0.23 | 0.041 |
|  | LP ( 3) O 39 | LP*( 6)Cd 37 | 33.33 | 0.33 | 0.099 |
|  | LP ( 4) O 39 | LP*( 6)Cd 37 | 29.74 | 0.22 | 0.074 |
|  | LP ( 3) O 39 | LP*( 6)Cd 38 | 12.24 | 0.34 | 0.063 |
|  | LP ( 4) O 39 | LP*( 6)Cd 38 | 40.47 | 0.23 | 0.091 |
|  |              | LP*( 8)Cd 38 | 12.61 | 0.33 | 0.062 |
|  | LP ( 3) O 40 | LP*( 6)Cd 37 | 34.03 | 0.31 | 0.097 |
|  |              | LP*( 8)Cd 37 | 14.43 | 0.62 | 0.088 |
|  | LP ( 4) O 40 | LP*( 6)Cd 38 | 63.17 | 0.25 | 0.119 |
